# Supplementary material
Source: PubMed Central journal article supplement (PMC7941819)

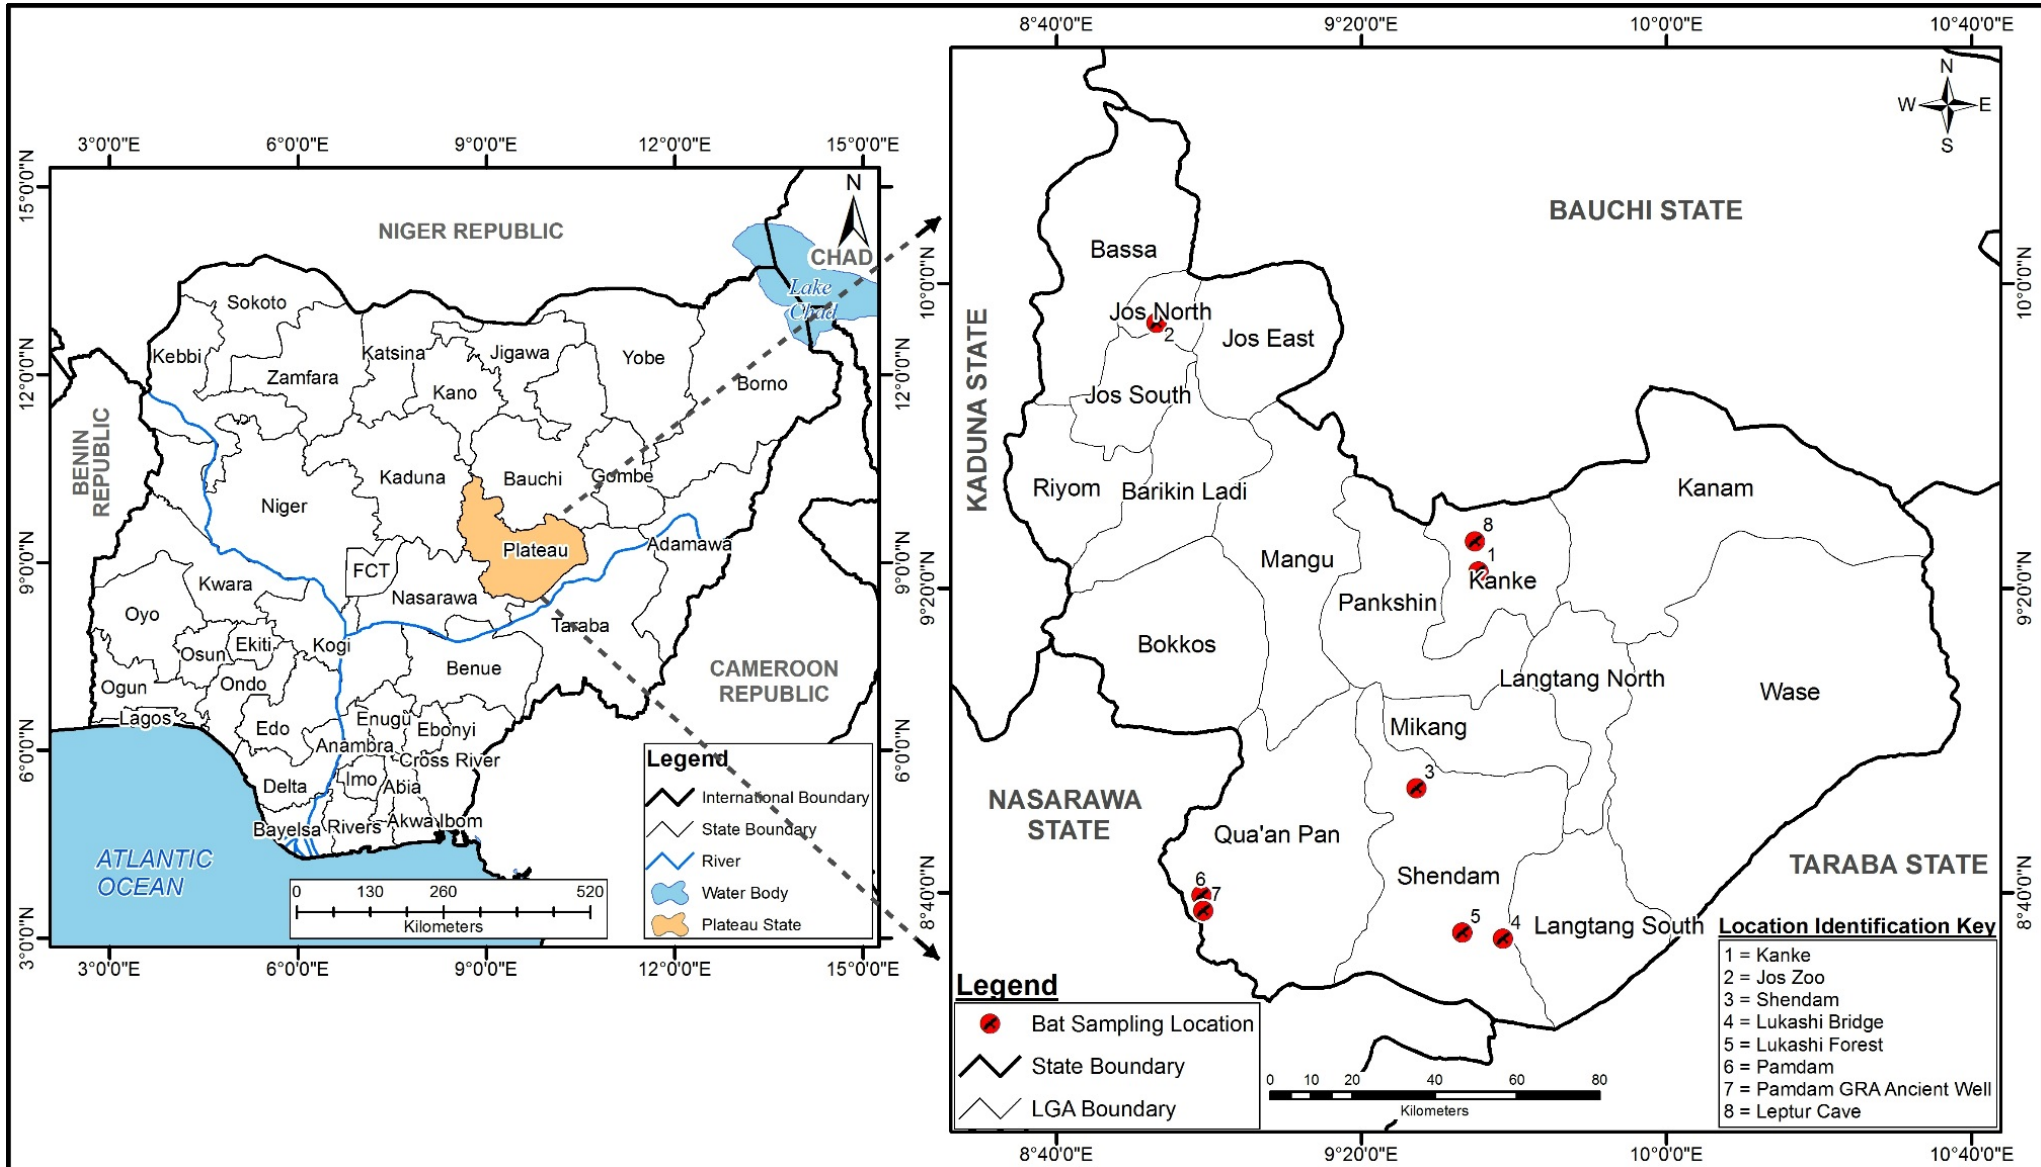

Supplement: tpmd190872.SD1.pdf [file tpmd190872.SD1.pdf]
